# Supplementary material
Source: publisher figshare collection journal article supplement (https://diabetesjournals.figshare.com/ndownloader/files/29100588)
Supplement: Supplementary file 1 [file 29100588]

**Supplemental Appendix**

Search Strategies

Embase

10/9/2020

Results: 1,073

('bexaglifozin'/exp OR bexaglifozin OR 'canagliflozin'/exp OR canagliflozin OR 'dapagliflozin'/exp OR dapagliflozin OR 'empagliflozin'/exp OR empagliflozin OR 'ertugliflozin'/exp OR ertugliflozin OR glifozin OR glifozins OR 'ipragliflozin'/exp OR ipragliflozin OR 'luseogliflozin'/exp OR luseogliflozin OR 'remogliflozin etabonate'/exp OR 'remogliflozin etabonate' OR 'sglt 2 inhibitor' OR 'sglt 2 inhibitors' OR 'sglt2 inhibitor'/exp OR 'sglt2 inhibitor' OR 'sglt-2 inhibitor' OR 'sglt2 inhibitors'/exp OR 'sglt2 inhibitors' OR 'sglt-2 inhibitors' OR 'sodium dependent glucose transporter 2 inhibitor' OR 'sodium glucose cotransporter 2 inhibitor'/exp OR 'sodium glucose cotransporter 2 inhibitor' OR 'sodium glucose co-transporter 2 inhibitor'/exp OR 'sodium glucose co-transporter 2 inhibitor' OR 'sodium glucose cotransporter 2 inhibitors' OR 'sodium-glucose co-transporter 2 inhibitors' OR 'sodium-glucose transporter 2 inhibitor' OR 'sodium-glucose transporter 2 inhibitors'/exp OR 'sodium-glucose transporter 2 inhibitors' OR 'sotagliflozin'/exp OR sotagliflozin OR 'tofogliflozin'/exp OR tofogliflozin) AND  'fournier gangrene'/exp OR 'fournier syndrome'/exp OR 'scrotum gangrene'/exp OR 'fournier s gangrene'/exp OR ((fournier OR fourniers OR 'fournier s' OR scrotum OR scrotal OR genital OR perineum OR perineal OR perianal) NEAR/5 (syndrome OR gangrene OR gangrenous OR disease OR necrosis OR necrotic OR necrotiz* OR infection OR inflammation))

Pubmed

10/9/2020

Results: 436

(("empagliflozin"[Supplementary Concept] OR empagliflozin OR "ertugliflozin"[Supplementary Concept] OR ertugliflozin OR glifozin OR glifozins OR "ipragliflozin"[Supplementary Concept] OR ipragliflozin OR "1,5-anhydro-1-(5-(4-ethoxybenzyl)-2-methoxy-4-methylphenyl)-1-thioglucitol"[Supplementary Concept] OR luseogliflozin OR "(2S,3R,4R,5S,6R)-2-(4-chloro-3-(4-ethoxybenzyl)phenyl)-6-(methylthio)tetrahydro-2H-pyran-3,4,5-triol"[Supplementary Concept] OR sotagliflozin OR "6-((4-ethylphenyl)methyl)-3',4',5',6'-tetrahydro-6'-(hydroxymethyl)spiro(isobenzofuran-1(3H),2'-(2H)pyran)-3',4',5'-triol"[Supplementary Concept] OR tofogliflozin OR "remogliflozin etabonate"[Supplementary Concept] OR "remogliflozin etabonate" OR "sodium-glucose transporter 2 inhibitors"[Pharmacological Action] OR "sodium-glucose transporter 2 inhibitors"[MeSH Terms] OR (sglt2 inhibitor) OR (sglt-2 inhibitor) OR (sglt 2 inhibitor) OR (sodium dependent glucose transporter 2 inhibitor) OR (sodium glucose cotransporter 2 inhibitor) OR (sodium glucose co-transporter 2 inhibitor))) AND(("fournier gangrene"[MeSH Terms] OR "fournier gangrene" OR "fournier syndrome" OR "fournier disease" OR "scrotum gangrene" OR "fournier's gangrene" OR "fournier's syndrome" OR "fournier's disease" OR (("scrotum"[MeSH Terms] OR scrotum OR scrotal OR "genitalia"[MeSH Terms] OR genital OR "perineum"[MeSH Terms] OR perineum OR "perineal" OR perianal) AND ("syndrome"[MeSH Terms] OR syndrome OR gangrene OR gangrenous OR disease OR "necrosis"[MeSH Terms] OR necrosis OR necrotic OR necrotising OR necrotiz* OR infection OR inflammation))))

Cochrane Library Trials

10/9/2020

Results: 286

Search Name: SGLT2 Inhibitors AND Fournier Gangrene

1. MeSH descriptor: [Sodium-Glucose Transporter 2 Inhibitors] explode all trees
2. empagliflozin OR ertugliflozin OR glifozin OR glifozins OR ipragliflozin OR luseogliflozin OR sotagliflozin OR tofogliflozin OR "remogliflozin etabonate" OR "sglt2 inhibitor" OR "sglt-2 inhibitor" OR "sglt 2 inhibitor" OR "sodium dependent glucose transporter 2 inhibitor" OR "sodium glucose cotransporter 2 inhibitor" OR "sodium glucose co-transporter 2 inhibitor"
3. #1 OR #2
4. MeSH descriptor: [Fournier Gangrene] explode all trees
5. "fournier gangrene" OR "fournier syndrome" OR "fournier disease" OR "scrotum gangrene" OR "fournier's gangrene" OR "fournier's syndrome" OR "fournier's disease"
6. #4 OR #5
7. MeSH descriptor: [Scrotum] explode all trees
8. MeSH descriptor: [Genitalia] explode all trees
9. MeSH descriptor: [Perineum] explode all trees
10. scrotum OR scrotal OR genital OR perineum OR perineal OR perianal
11. #7 OR #8 OR #9 OR #10
12. MeSH descriptor: [Syndrome] explode all trees
13. MeSH descriptor: [Necrosis] explode all trees
14. syndrome OR gangrene OR gangrenous OR disease Or necrosis OR necrotic OR necrotising OR necrotiz* OR infection OR inflammation
15. #12 OR #13 OR #14
16. #11 AND #15
17. #6 OR #16
18. #3 AND #17
